# Supplementary material
Source: Springer Nature journal article supplement (https://www.springermedizin.de/resource/supplementary/13054_2013_2097_MOESM1_ESM.pdf/9711606)

NO ARC

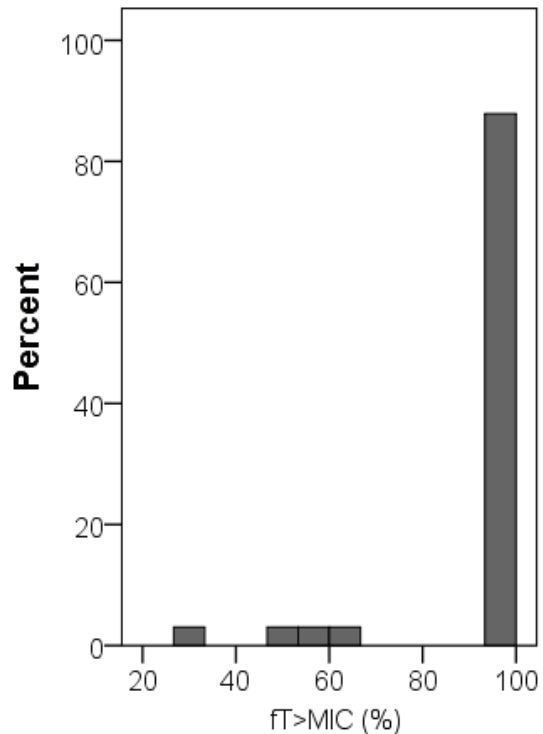

ARC

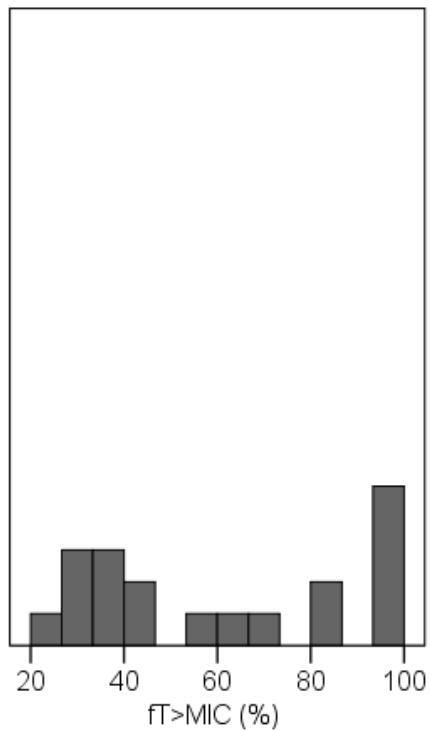

Supplement: MOESM1 [file 9711606]
